# Supplementary material for: Chiroptical, linear, and second-order nonlinear optical properties of binaphthol derivatives
Source: Royal Society of Chemistry journal article supplement (doi:10.1039/c2ob26374b), 2012-01-01
Supplement: c2ob26374b.pdf [file c2ob26374b.pdf]

# Chiroptical, Linear, and Second-order Nonlinear Optical Properties of Binaphthol Derivatives

Guochun Yang,<sup>\*[a]</sup> Yanling Si,<sup>[b]</sup> and Zhongmin Su<sup>\*[a]</sup>

[a] Institute of Functional Material Chemistry, Department of Chemistry, Northeast Normal

University, Changchun, Jilin, 130024, China

[b] College of Resource and Environmental Science, Jilin Agricultural University, Changchun,

Jilin, 130118, China

AUTHOR EMAIL ADDRESS: [yanggc468@nenu.edu.cn](mailto:yanggc468@nenu.edu.cn); [zmsu@nenu.edu.cn](mailto:zmsu@nenu.edu.cn)

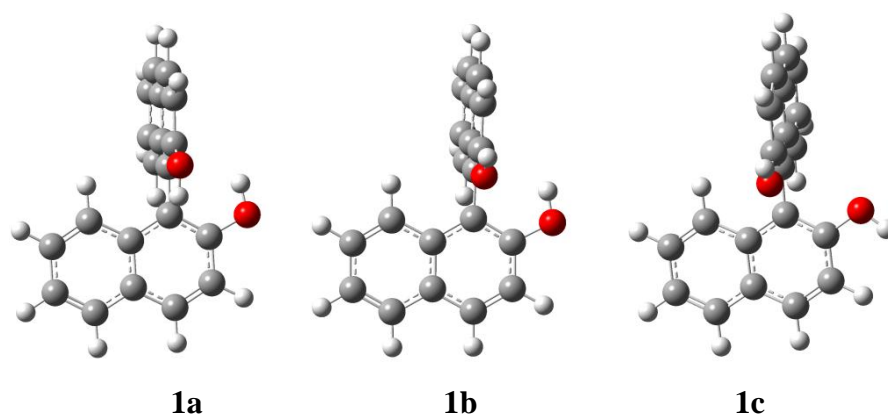

**Figure S1.** Optimized geometries of the three most stable conformers of **1** at the B3LYP/cc-pVDZ level of theory.

**TABLE S1.** The relative Gibbs free energies  $\Delta G$  (kcal/mol), relative total energies  $\Delta E$  (kcal/mol), and the normalized Boltzmann factor  $B_f$  (in %) at 298.15 K based on the relative Gibbs free energy and the relative total energy of the conformers of **1** at the B3LYP/cc-pVDZ level of theory.

| Conformer | $\Delta E$ | $B_f(\Delta E)$ | $\Delta G$ | $B_f(\Delta G)$ |
|-----------|------------|-----------------|------------|-----------------|
| <b>1a</b> | 0          | 99.83           | 0          | 99.82           |
| <b>1b</b> | 3.77       | 0.17            | 3.74       | 0.18            |
| <b>1c</b> | 6.88       | 0               | 6.67       | 0.              |

**TABLE S2.** The relative Gibbs free energies  $\Delta G$  (kcal/mol), relative total energies  $\Delta E$  (kcal/mol), and the normalized Boltzmann factor  $B_f$  (in %) at 298.15 K based on the relative Gibbs free energy and the relative total energy of the conformers of **2** at the B3LYP/cc-pVDZ level of theory.

| Conformer    | $\Delta E$ | $B_f(\Delta E)$ | $\Delta G$ | $B_f(\Delta G)$ |
|--------------|------------|-----------------|------------|-----------------|
| <b>Boat</b>  | 0          | 63.32           | 0          | 66.92           |
| <b>Chair</b> | 0.32       | 36.68           | 0.42       | 33.08           |

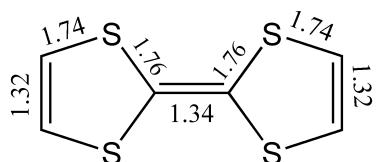

### Experimental TTF monomer structure

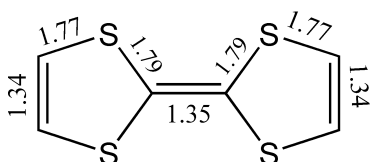

### Calculated TTF monomer structure

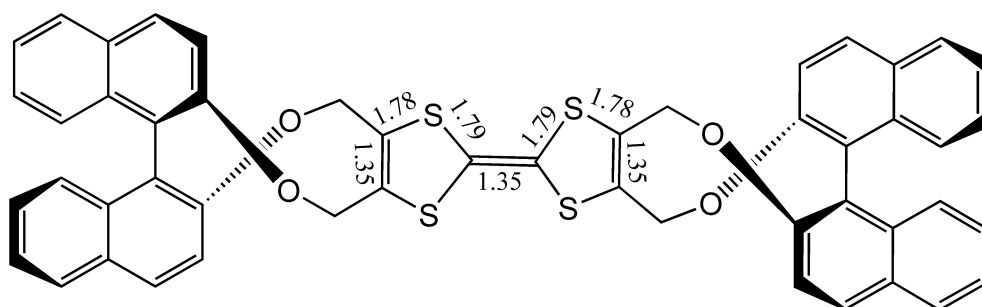

### TTF structure in System 5

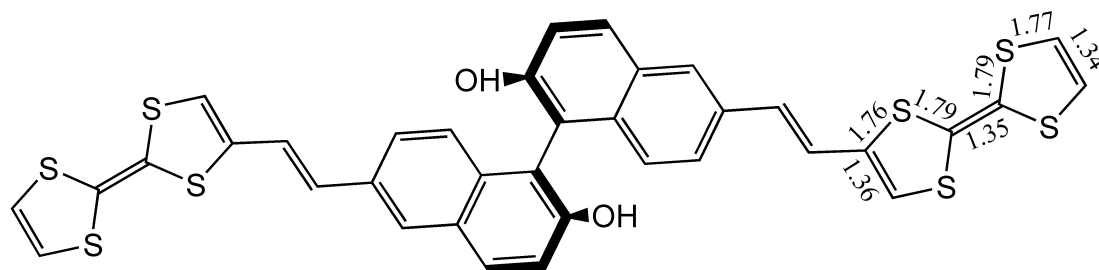

### TTF structure in System 6

**Figure S2.** Main TTF structural parameters in monomer and in the derivatives **5** and **6**.

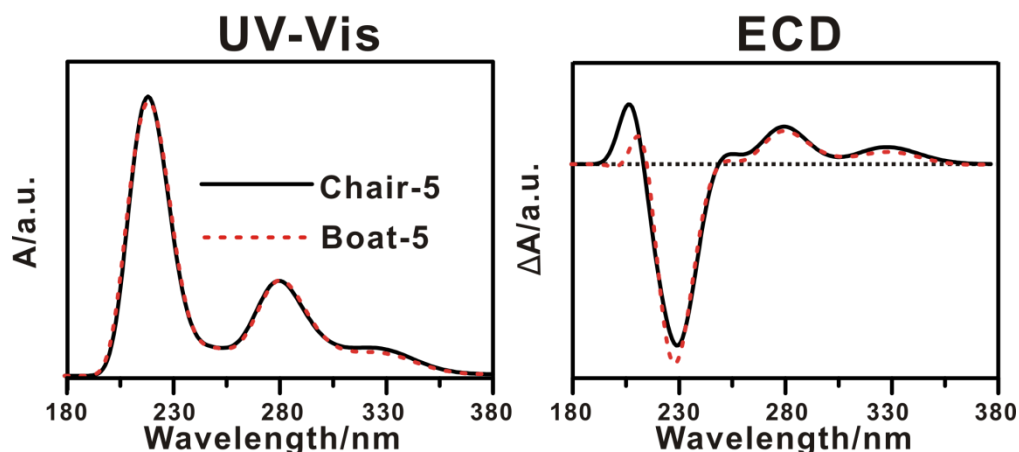

**Figure S3.** The simulated UV spectra (left) and CD spectra (right) of the two most stable conformers (Chair and Boat).

**Table S3.** The Calculated excitation energies, oscillator strengths and rotational strengths for the neutral state in the gas phase at the B3LYP/cc-pVDZ level of theory of compound **1**.

| states | eV     | $\lambda^a$ | $f^b$  | Rlength <sup>c</sup> | Rvelocity <sup>c</sup> |
|--------|--------|-------------|--------|----------------------|------------------------|
| 1      | 3.8932 | 318.46      | 0.0190 | -8.7862              | -8.2847                |
| 2      | 3.9016 | 317.77      | 0.0000 | 0.0454               | -0.1009                |
| 3      | 4.0521 | 305.98      | 0.1237 | -16.5915             | -18.8448               |
| 4      | 4.0801 | 303.88      | 0.0152 | 66.6196              | 72.0004                |
| 5      | 4.4718 | 277.26      | 0.0431 | -12.3791             | -13.2966               |
| 6      | 4.4822 | 276.61      | 0.0010 | 2.3183               | 2.5715                 |
| 7      | 4.6742 | 265.25      | 0.0025 | 0.8466               | 0.7596                 |
| 8      | 4.6743 | 265.24      | 0.0005 | 1.8359               | 1.4438                 |
| 9      | 4.8798 | 254.08      | 0.0016 | -0.9165              | -1.2598                |
| 10     | 4.8834 | 253.89      | 0.0077 | -4.2222              | -5.3101                |
| 11     | 5.4591 | 227.11      | 0.3301 | -515.5974            | -525.8279              |
| 12     | 5.5170 | 224.73      | 0.1108 | 260.7425             | 267.4812               |
| 13     | 5.6047 | 221.21      | 0.0323 | 64.8656              | 64.5669                |
| 14     | 5.6113 | 220.96      | 0.0399 | -48.9804             | -48.2418               |
| 15     | 5.6441 | 219.67      | 0.0473 | 78.7726              | 76.4788                |
| 16     | 5.6546 | 219.26      | 0.1258 | -55.7466             | -63.2045               |
| 17     | 5.6930 | 217.78      | 0.3414 | -102.0544            | -101.2094              |
| 18     | 5.7624 | 215.16      | 0.2325 | 354.7598             | 364.7665               |
| 19     | 5.8001 | 213.76      | 0.4982 | -716.4754            | -722.0893              |
| 20     | 5.8586 | 211.63      | 0.0830 | 46.5660              | 48.4909                |

---

|    |        |        |        |           |           |
|----|--------|--------|--------|-----------|-----------|
| 21 | 5.8755 | 211.02 | 0.0706 | 14.8608   | 15.1932   |
| 22 | 5.8851 | 210.67 | 0.2764 | 300.3366  | 304.3541  |
| 23 | 6.0944 | 203.44 | 0.1397 | -305.4308 | -308.5138 |
| 24 | 6.1021 | 203.18 | 0.2188 | 503.6558  | 513.5018  |
| 25 | 6.3439 | 195.44 | 0.0026 | 31.6079   | 32.0199   |
| 26 | 6.3459 | 195.38 | 0.0303 | 150.7991  | 150.7149  |
| 27 | 6.4440 | 192.40 | 0.0040 | 0.4266    | 0.4361    |
| 28 | 6.4494 | 192.24 | 0.0002 | 0.8989    | 0.4905    |
| 29 | 6.5712 | 188.68 | 0.0002 | 0.7510    | 0.8855    |
| 30 | 6.5846 | 188.29 | 0.0648 | 22.0554   | 23.5050   |
| 31 | 6.6047 | 187.72 | 0.0326 | -25.0129  | -26.0675  |
| 32 | 6.6091 | 187.60 | 0.0038 | -0.1644   | -0.1633   |
| 33 | 6.6684 | 185.93 | 0.0204 | -4.3954   | -5.6378   |
| 34 | 6.6921 | 185.27 | 0.0083 | -14.9169  | -19.5794  |
| 35 | 6.7028 | 184.97 | 0.0030 | -0.8087   | -0.8106   |
| 36 | 6.7164 | 184.60 | 0.0132 | -29.1294  | -34.1484  |
| 37 | 6.7949 | 182.47 | 0.0001 | 1.1547    | -0.1896   |
| 38 | 6.7959 | 182.44 | 0.0001 | -0.3643   | 0.4386    |
| 39 | 6.8124 | 182.00 | 0.0114 | 3.5939    | 3.7538    |
| 40 | 6.8294 | 181.54 | 0.0063 | 8.4642    | 8.1603    |
| 41 | 7.0321 | 176.31 | 0.0001 | -0.3761   | -0.5207   |
| 42 | 7.0323 | 176.31 | 0.0000 | -0.7363   | -0.4276   |
| 43 | 7.1301 | 173.89 | 0.0179 | -2.0860   | -2.1806   |
| 44 | 7.1338 | 173.80 | 0.0203 | 8.4555    | 8.2019    |
| 45 | 7.1517 | 173.36 | 0.0111 | -5.8624   | -5.2582   |
| 46 | 7.1797 | 172.69 | 0.0129 | 5.0653    | 4.8880    |
| 47 | 7.1927 | 172.38 | 0.0016 | 8.0484    | 7.0305    |
| 48 | 7.2068 | 172.04 | 0.0068 | -3.5862   | -2.4779   |
| 49 | 7.2841 | 170.21 | 0.0015 | -5.2395   | -6.6992   |
| 50 | 7.3076 | 169.66 | 0.0001 | 0.1758    | 0.8136    |
| 51 | 7.3566 | 168.54 | 0.0074 | -28.7742  | -19.4103  |
| 52 | 7.3728 | 168.16 | 0.0083 | -11.1181  | -5.0663   |
| 53 | 7.4051 | 167.43 | 0.0037 | -17.3484  | -11.0365  |
| 54 | 7.4068 | 167.39 | 0.0052 | 8.7013    | 6.2717    |
| 55 | 7.4370 | 166.71 | 0.0001 | -0.6400   | -0.7344   |
| 56 | 7.4488 | 166.45 | 0.0002 | 2.1103    | 1.7778    |
| 57 | 7.4562 | 166.28 | 0.0192 | -9.2769   | -9.8723   |
| 58 | 7.4833 | 165.68 | 0.0366 | -4.0598   | -3.6535   |
| 59 | 7.4931 | 165.47 | 0.0100 | 21.4211   | 18.7564   |
| 60 | 7.5249 | 164.77 | 0.0049 | -4.5310   | -4.6113   |
| 61 | 7.5807 | 163.55 | 0.0082 | 9.1994    | 9.4202    |
| 62 | 7.5916 | 163.32 | 0.0000 | -0.7642   | -0.2600   |
| 63 | 7.5991 | 163.16 | 0.0302 | -7.9479   | -8.1316   |
| 64 | 7.6011 | 163.11 | 0.0027 | 12.7311   | 12.5987   |

---

---

|     |        |        |        |          |          |
|-----|--------|--------|--------|----------|----------|
| 65  | 7.6222 | 162.66 | 0.0348 | -26.3035 | -27.1599 |
| 66  | 7.6287 | 162.52 | 0.0001 | 0.1866   | 0.8604   |
| 67  | 7.6770 | 161.50 | 0.0017 | 6.9069   | 7.0270   |
| 68  | 7.6805 | 161.43 | 0.0081 | -7.9766  | -8.6129  |
| 69  | 7.7501 | 159.98 | 0.0030 | -6.7601  | -7.6709  |
| 70  | 7.7575 | 159.83 | 0.0032 | 3.1708   | 3.3650   |
| 71  | 7.7695 | 159.58 | 0.0073 | 11.2275  | 11.6041  |
| 72  | 7.7720 | 159.53 | 0.0018 | -12.5539 | -8.8399  |
| 73  | 7.8305 | 158.33 | 0.0042 | -19.4874 | -20.9342 |
| 74  | 7.8372 | 158.20 | 0.4764 | -62.1129 | -67.9563 |
| 75  | 7.8472 | 158.00 | 0.0792 | 59.8475  | 60.8865  |
| 76  | 7.8602 | 157.74 | 0.0036 | -1.4072  | -0.9714  |
| 77  | 7.8628 | 157.68 | 0.0005 | 14.5250  | 12.8637  |
| 78  | 7.8802 | 157.34 | 0.0124 | 11.5614  | 11.1501  |
| 79  | 7.8830 | 157.28 | 0.1215 | -8.0698  | -7.2124  |
| 80  | 7.8917 | 157.11 | 0.0004 | 10.7326  | 6.3269   |
| 81  | 7.9591 | 155.78 | 0.0011 | 3.7044   | 4.0428   |
| 82  | 7.9624 | 155.71 | 0.0001 | 0.3410   | 0.2671   |
| 83  | 8.0535 | 153.95 | 0.0543 | 4.5586   | 5.4994   |
| 84  | 8.0619 | 153.79 | 0.0067 | -3.7141  | -3.8863  |
| 85  | 8.1301 | 152.50 | 0.0223 | -14.2843 | -13.1698 |
| 86  | 8.1354 | 152.40 | 0.0004 | -0.1109  | -0.5866  |
| 87  | 8.1645 | 151.86 | 0.0004 | -1.1933  | -1.4288  |
| 88  | 8.1835 | 151.50 | 0.0008 | -0.6553  | -0.4369  |
| 89  | 8.1840 | 151.50 | 0.0025 | -4.1980  | -3.9450  |
| 90  | 8.2032 | 151.14 | 0.0001 | 2.9850   | 1.3469   |
| 91  | 8.2052 | 151.10 | 0.0192 | -3.8067  | -2.9098  |
| 92  | 8.2416 | 150.44 | 0.0009 | 1.7755   | 1.4644   |
| 93  | 8.2504 | 150.28 | 0.0262 | 31.4423  | 33.0905  |
| 94  | 8.2538 | 150.21 | 0.0089 | 0.4379   | 0.4284   |
| 95  | 8.2970 | 149.43 | 0.0144 | 5.2568   | 5.5637   |
| 96  | 8.3030 | 149.32 | 0.0016 | -1.6931  | -2.3720  |
| 97  | 8.3164 | 149.08 | 0.2299 | -28.2670 | -29.4477 |
| 98  | 8.3369 | 148.72 | 0.0134 | -17.3201 | -17.7164 |
| 99  | 8.3768 | 148.01 | 0.0000 | 0.9302   | 0.4332   |
| 100 | 8.3811 | 147.93 | 0.0116 | 15.8401  | 14.6714  |
| 101 | 8.4017 | 147.57 | 0.0025 | -10.5705 | -6.4456  |
| 102 | 8.4110 | 147.41 | 0.0029 | 12.1730  | 8.6729   |
| 103 | 8.4246 | 147.17 | 0.0003 | -2.7334  | -2.3135  |
| 104 | 8.4422 | 146.86 | 0.0052 | 4.0574   | 2.4465   |
| 105 | 8.4589 | 146.57 | 0.0066 | -6.5311  | -5.4669  |
| 106 | 8.4630 | 146.50 | 0.0005 | 2.6567   | 7.8003   |
| 107 | 8.4712 | 146.36 | 0.0008 | 5.0293   | 4.0992   |
| 108 | 8.4739 | 146.31 | 0.0026 | 1.5931   | -0.2459  |

---

|     |        |        |        |          |          |
|-----|--------|--------|--------|----------|----------|
| 109 | 8.4946 | 145.96 | 0.0016 | 5.5957   | 4.1949   |
| 110 | 8.4988 | 145.88 | 0.0016 | -5.2729  | -3.5062  |
| 111 | 8.5113 | 145.67 | 0.0005 | -2.0831  | -1.7396  |
| 112 | 8.5124 | 145.65 | 0.0022 | -2.6502  | -2.8943  |
| 113 | 8.5470 | 145.06 | 0.0005 | -1.6796  | -1.6416  |
| 114 | 8.5639 | 144.77 | 0.0001 | 0.5694   | 0.8116   |
| 115 | 8.6293 | 143.68 | 0.0106 | 4.9601   | 5.9738   |
| 116 | 8.6338 | 143.60 | 0.0022 | 3.8194   | 3.4570   |
| 117 | 8.6536 | 143.27 | 0.0294 | -24.4791 | -24.5309 |
| 118 | 8.6781 | 142.87 | 0.0105 | -1.2823  | -0.9823  |
| 119 | 8.6944 | 142.60 | 0.0094 | 29.9251  | 27.1671  |
| 120 | 8.6966 | 142.57 | 0.0017 | -3.0983  | -2.0627  |
| 121 | 8.7082 | 142.38 | 0.0005 | 1.1588   | 3.5971   |
| 122 | 8.7411 | 141.84 | 0.0015 | 0.5013   | 0.4226   |
| 123 | 8.7437 | 141.80 | 0.0054 | 18.3131  | 16.9493  |
| 124 | 8.7661 | 141.44 | 0.0042 | -16.2075 | -17.5695 |
| 125 | 8.7699 | 141.37 | 0.0013 | -3.7169  | -3.6215  |
| 126 | 8.7832 | 141.16 | 0.0005 | -4.0380  | -4.1590  |
| 127 | 8.8195 | 140.58 | 0.0124 | 1.2844   | 1.3514   |
| 128 | 8.8377 | 140.29 | 0.0004 | -0.9911  | -1.3142  |
| 129 | 8.8795 | 139.63 | 0.0001 | -0.0027  | -0.0036  |
| 130 | 8.8859 | 139.53 | 0.0001 | 0.5150   | 0.5922   |
| 131 | 8.9280 | 138.87 | 0.0010 | 4.9857   | 3.3143   |
| 132 | 8.9358 | 138.75 | 0.0010 | -5.6231  | -4.3135  |
| 133 | 8.9580 | 138.41 | 0.0018 | -1.9193  | -1.7502  |
| 134 | 8.9644 | 138.31 | 0.0000 | -0.0685  | -0.2098  |
| 135 | 9.0562 | 136.91 | 0.0006 | 0.6604   | 0.6369   |
| 136 | 9.0587 | 136.87 | 0.0001 | -0.1378  | -0.1077  |
| 137 | 9.0742 | 136.63 | 0.0010 | 1.2163   | 1.5639   |
| 138 | 9.0938 | 136.34 | 0.0018 | -13.7176 | -13.7034 |
| 139 | 9.0982 | 136.27 | 0.0009 | 2.8326   | 3.0898   |
| 140 | 9.1165 | 136.00 | 0.0211 | -3.1015  | -2.7490  |
| 141 | 9.1256 | 135.86 | 0.0108 | 4.9770   | 5.7773   |
| 142 | 9.1332 | 135.75 | 0.0084 | 0.7828   | 0.7843   |
| 143 | 9.1341 | 135.74 | 0.0001 | 5.5577   | 4.6381   |
| 144 | 9.1427 | 135.61 | 0.0000 | -3.2319  | -0.0348  |
| 145 | 9.1498 | 135.50 | 0.0012 | -4.7795  | -3.7511  |
| 146 | 9.1524 | 135.47 | 0.0056 | 5.3835   | 4.4810   |
| 147 | 9.1698 | 135.21 | 0.0010 | 0.7505   | -0.2483  |
| 148 | 9.1791 | 135.07 | 0.0007 | -3.1792  | -3.7541  |
| 149 | 9.1917 | 134.89 | 0.0005 | -0.4880  | -0.7285  |
| 150 | 9.1979 | 134.80 | 0.0006 | -1.0307  | -1.3614  |

<sup>a</sup> $\lambda$  in nm. <sup>b</sup> Oscillator Strengths. <sup>c</sup> R values (in  $10^{-40}$  esu<sup>2</sup>cm<sup>2</sup>) using the velocity-gauge representation and length-gauge representation of the electric dipole operator.

**Table S4.** Calculated Electron Absorption Energy ( $\lambda_{\text{cal}}$ , nm), Oscillators Strengths ( $f$ ),

Major Contribution, and Experimental Data ( $\lambda_{\text{exp}}$ , nm) of compounds **1-7**

| Species  | $\lambda_{\text{exp}}$ | $\lambda_{\text{cal}}$ | $f$    | main contribution |
|----------|------------------------|------------------------|--------|-------------------|
| <b>1</b> | 230                    | 211                    | 0.2764 | HOMO-4→LUMO+1     |
|          |                        |                        |        | HOMO-3→LUMO+3     |
|          | 335                    | 306                    | 0.1237 | HOMO→LUMO         |
|          |                        |                        |        | HOMO-1→LUMO +1    |
| <b>2</b> | 208                    | 201                    | 0.3483 | HOMO-3→LUMO+3     |
|          |                        |                        |        | HOMO-1→LUMO+5     |
|          | 236                    | 224                    | 0.3476 | HOMO-1→LUMO+3     |
|          |                        |                        |        | HOMO-2→LUMO+2     |
|          | 264                    | 273                    | 0.2109 | HOMO→LUMO+2       |
|          |                        |                        |        | HOMO-5→LUMO       |
|          | 328                    | 381                    | 0.0838 | HOMO→LUMO         |
|          |                        |                        |        |                   |
| <b>3</b> |                        | 208                    | 0.3737 | HOMO-6→LUMO+3     |
|          |                        |                        |        | HOMO-6→LUMO+2     |
|          |                        | 313                    | 0.2137 | HOMO-1→LUMO       |
|          |                        |                        |        | HOMO-2→LUMO       |
| <b>5</b> |                        | 217                    | 0.3952 | HOMO-14→LUMO      |
|          |                        |                        |        | HOMO-15→LUMO+1    |
|          | 280                    |                        | 0.5263 | HOMO→LUMO +12     |
|          |                        |                        |        | HOMO→LUMO+13      |
| <b>6</b> |                        | 305                    | 0.7311 | HOMO-4→LUMO       |
|          |                        |                        |        | HOMO-5→LUMO +1    |
|          | 353                    |                        | 1.2558 | HOMO-3→LUMO       |



|          |     |     |        |                                |
|----------|-----|-----|--------|--------------------------------|
|          |     |     |        | HOMO-2→LUMO+1                  |
|          |     | 496 | 0.2666 | HOMO-1→LUMO<br>HOMO→LUMO+1     |
| <b>7</b> | 301 | 307 | 0.1162 | HOMO-2→LUMO+4<br>HOMO-3→LUMO+4 |
|          | 343 | 355 | 0.5288 | HOMO-10→LUMO+1<br>HOMO→LUMO+5  |
|          | 455 | 469 | 0.4614 | HOMO-2→LUMO+1<br>HOMO→LUMO+3   |
|          |     | 691 | 0.2308 | HOMO→LUMO+1<br>HOMO-1→LUMO     |

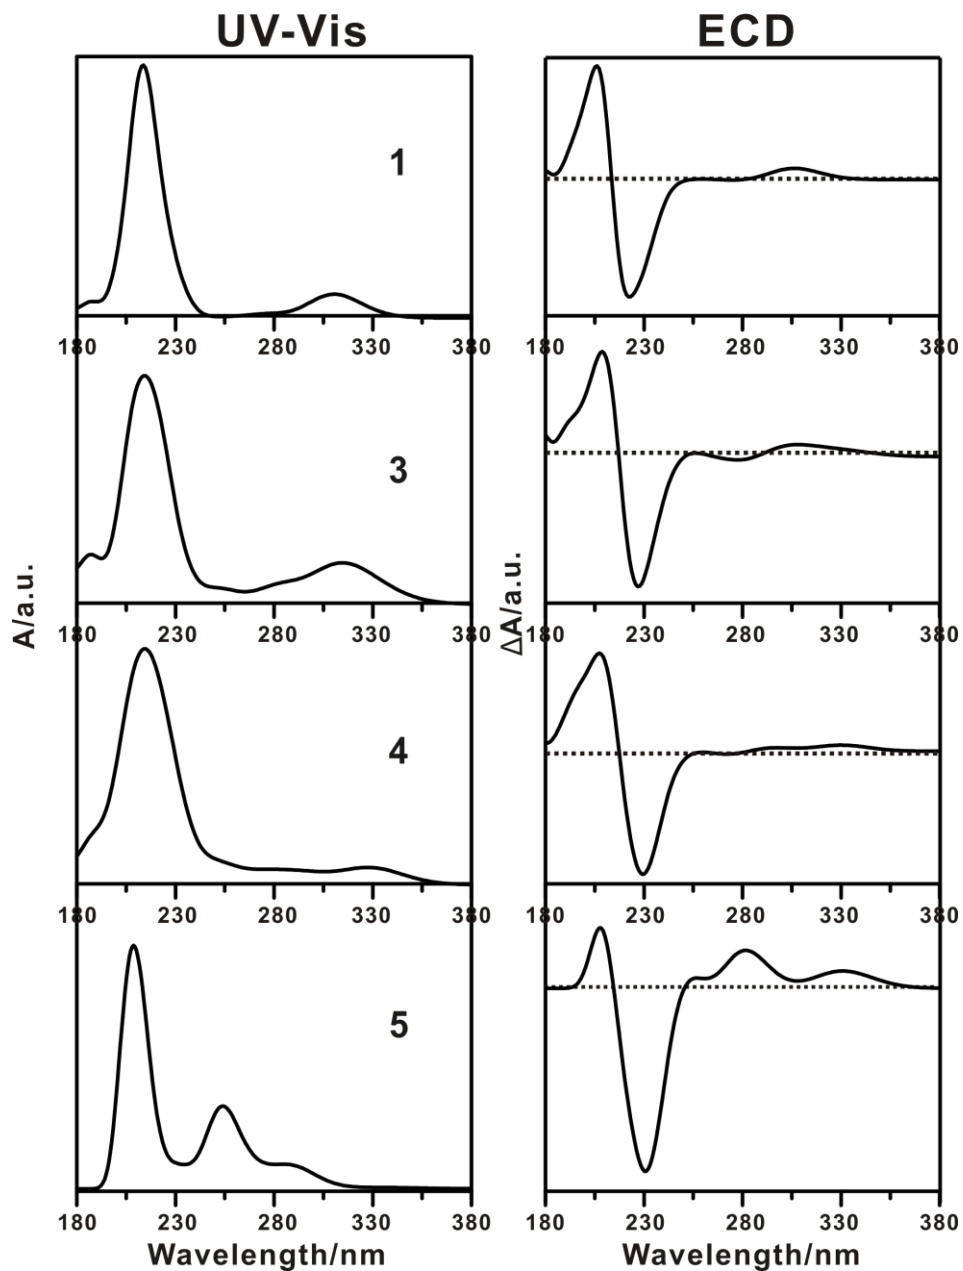

**Figure S4.** Calculated UV (left) and CD (right) spectra of compounds **1**, **3**, **4** and **5** at the TDB3LYP/cc-pVDZ level of theory.

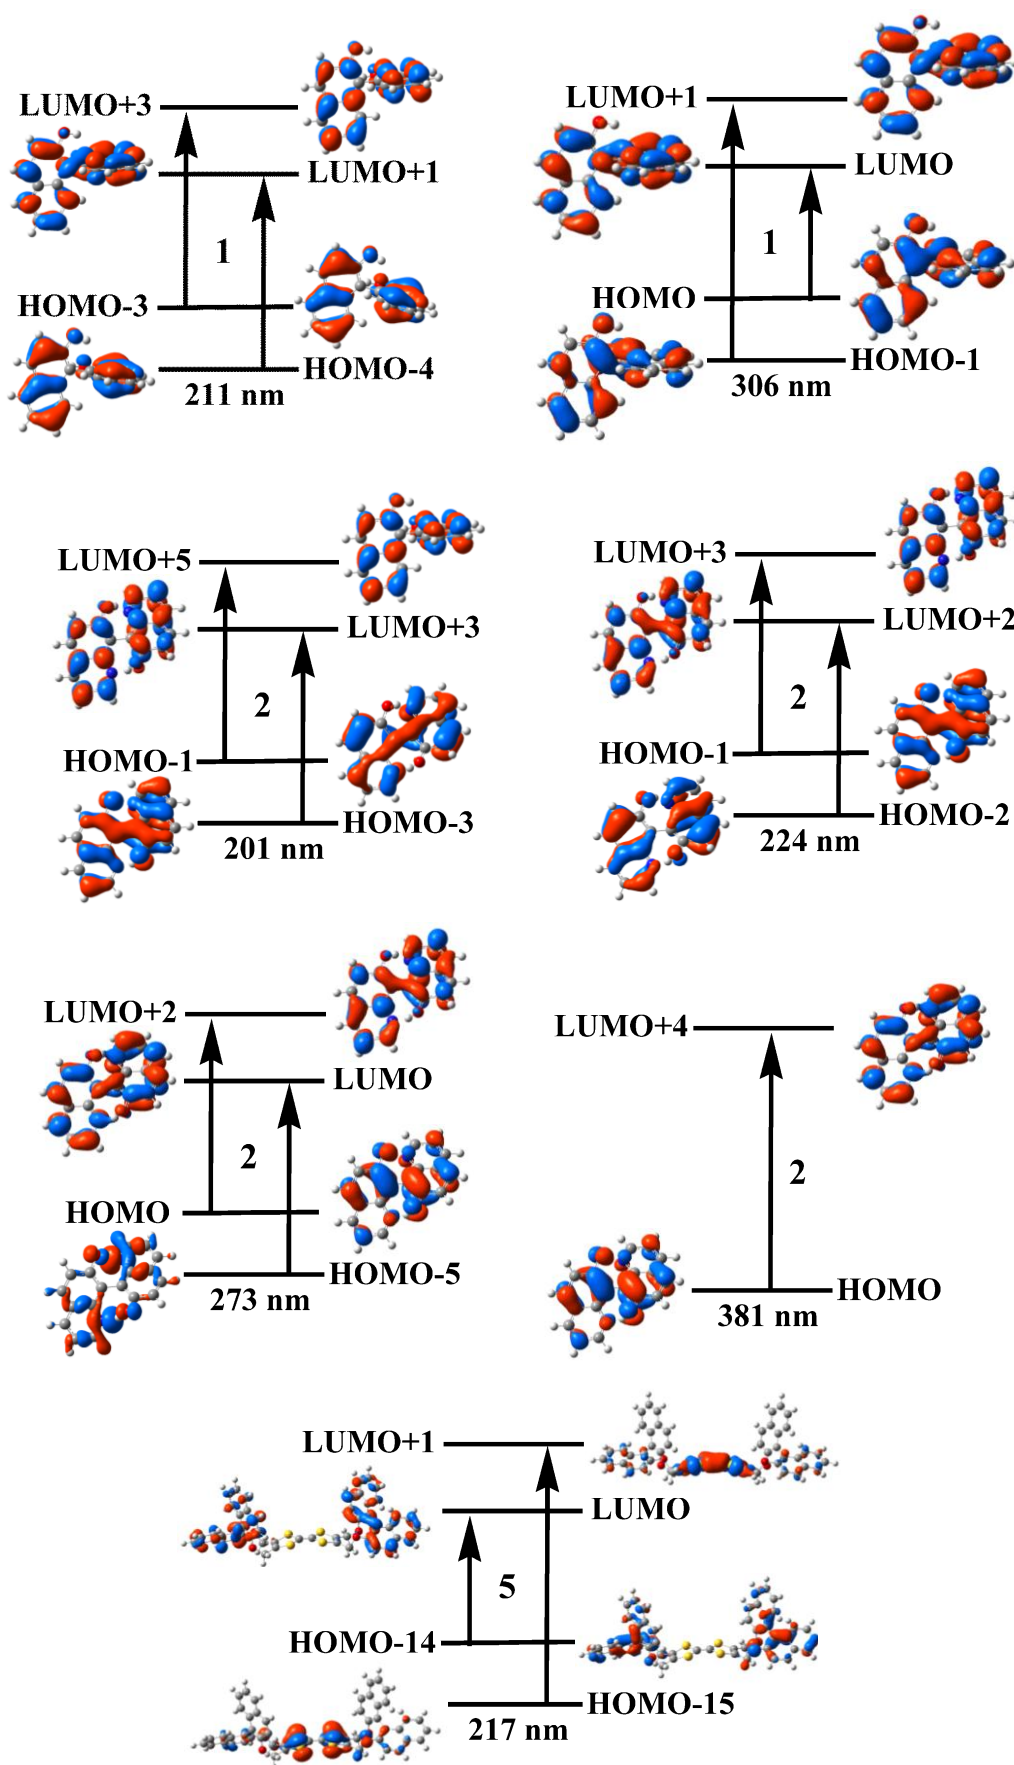

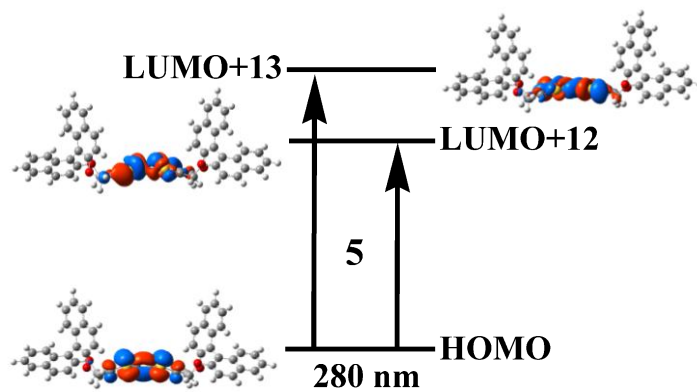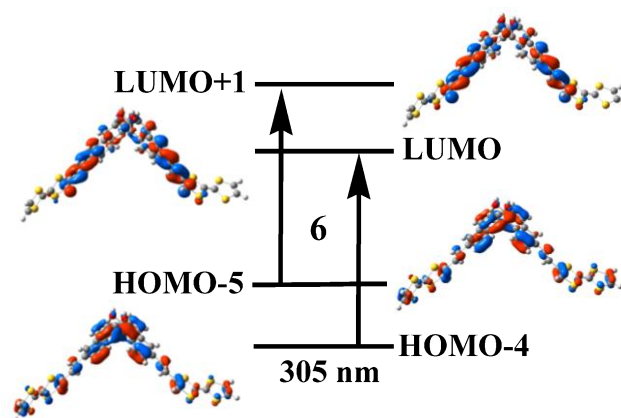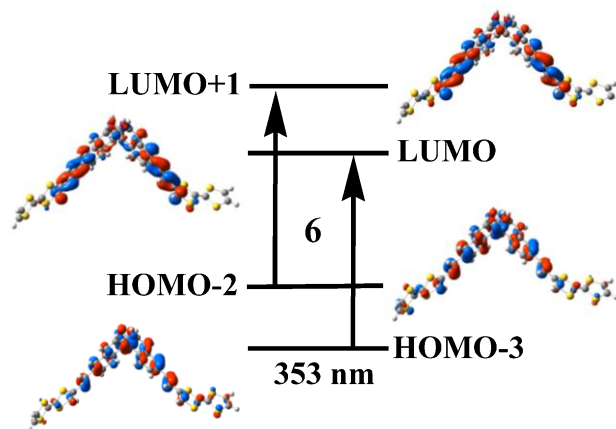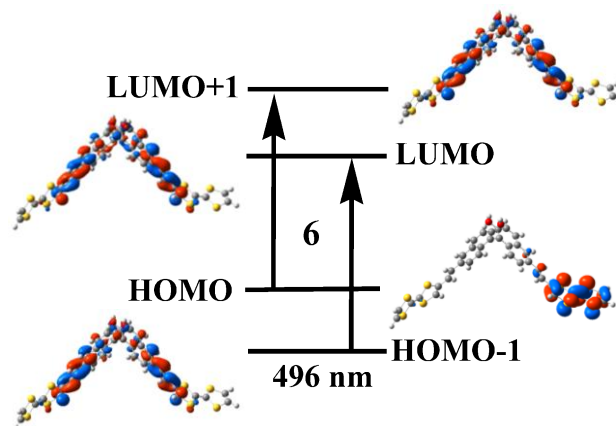

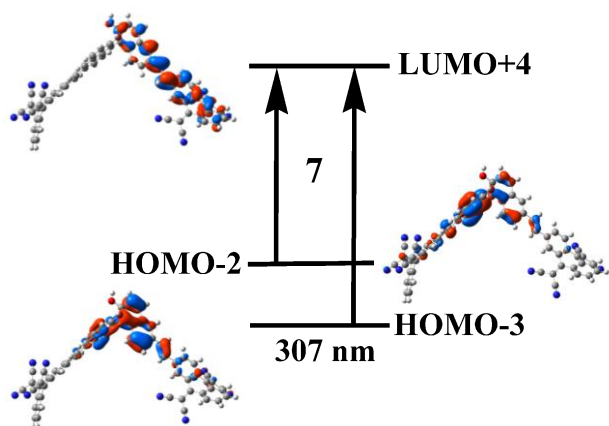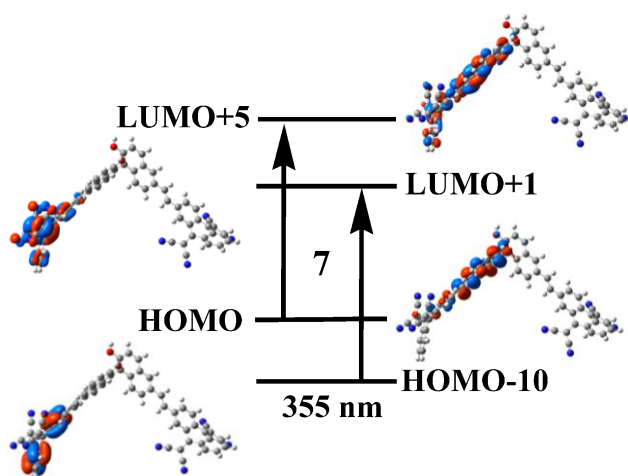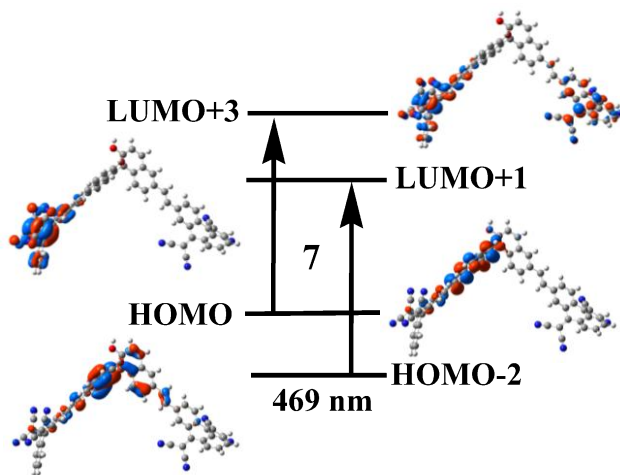

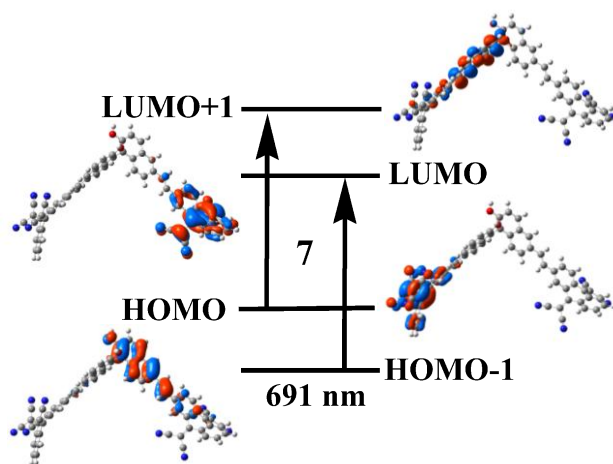

**Figure S5.** Molecular orbitals involved into the main absorption transition of compounds **1**, **2**, **5-7**.

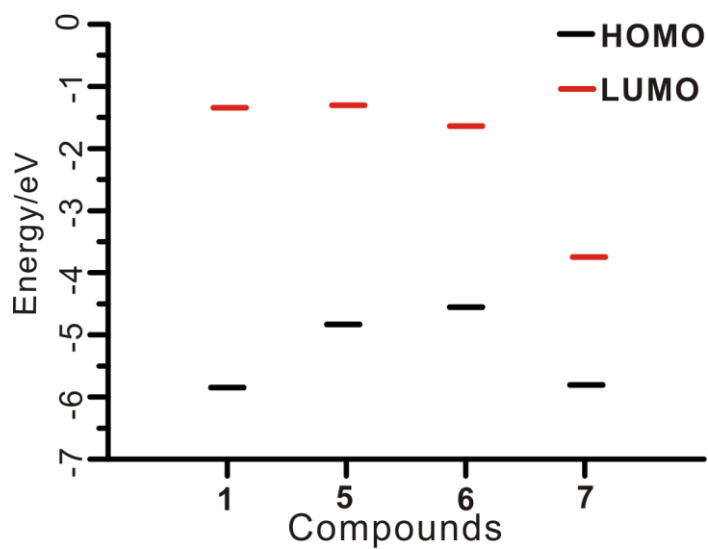

**Figure S6.** Orbital energy level diagrams of the concerned compounds

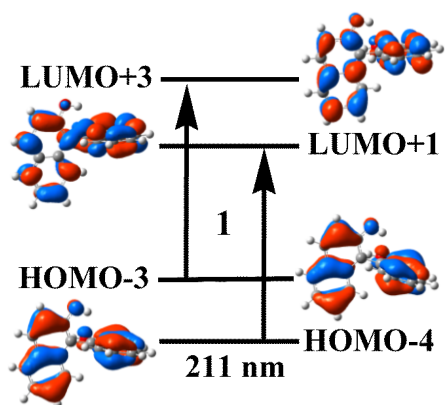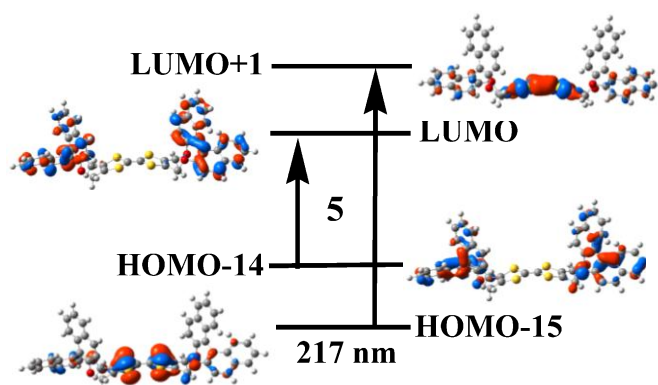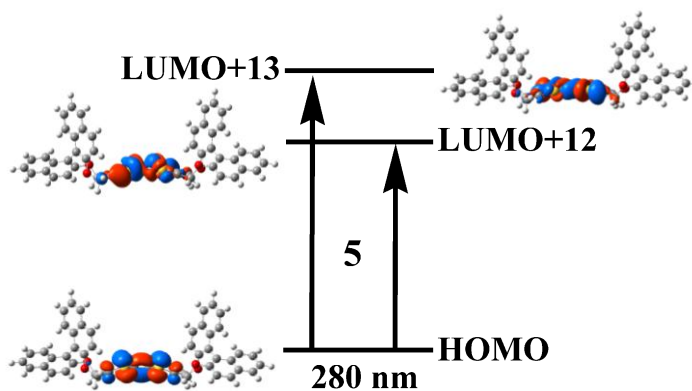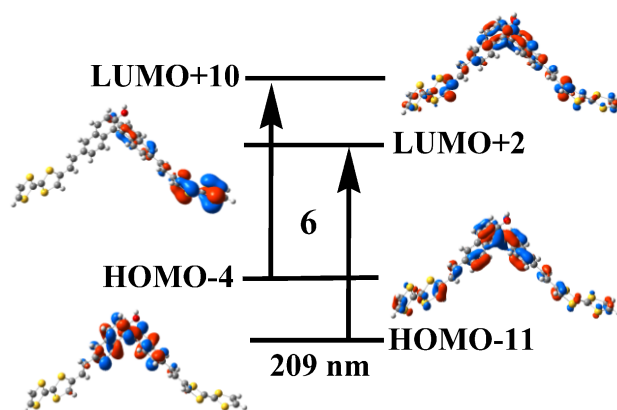

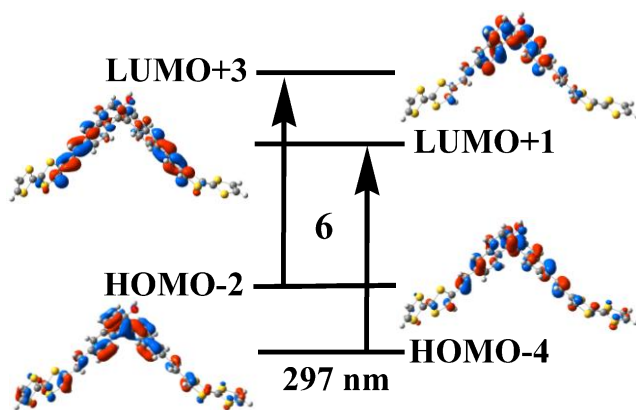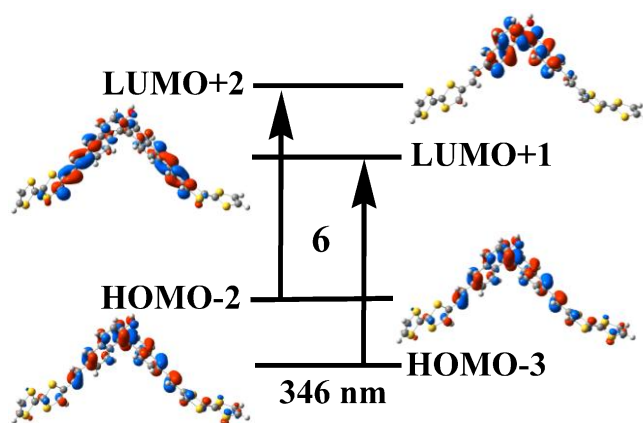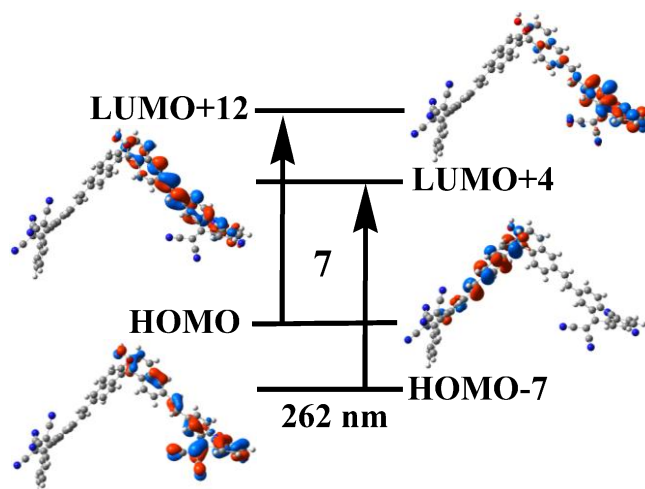



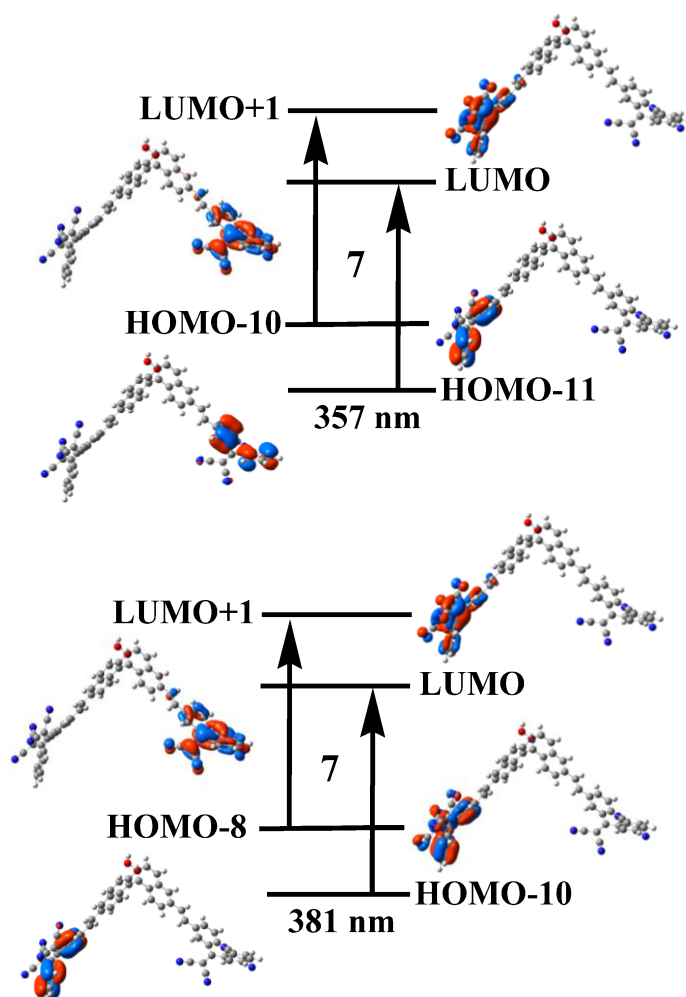

**Figure S7.** Molecular orbitals involved into the main CD transition of compounds **1** and **5-7**.

**Table S4.** Calculated OR values at five different excitation wavelengths (589, 578, 546, 436, and 365 nm) of compounds **5-7** at B3LYP/cc-pVTZ level of theory.

| Compound | 589      | 578      | 546      | 436       | 365        |
|----------|----------|----------|----------|-----------|------------|
| <b>5</b> | 1069.49  | 1133.71  | 1360.17  | 3075.64   | 8564.14    |
| <b>6</b> | -479.77  | -468.44  | -223.44  | -28476.32 | -3383.82   |
| <b>7</b> | -4090.05 | -3961.90 | -3932.49 | -13428.84 | -203025.11 |

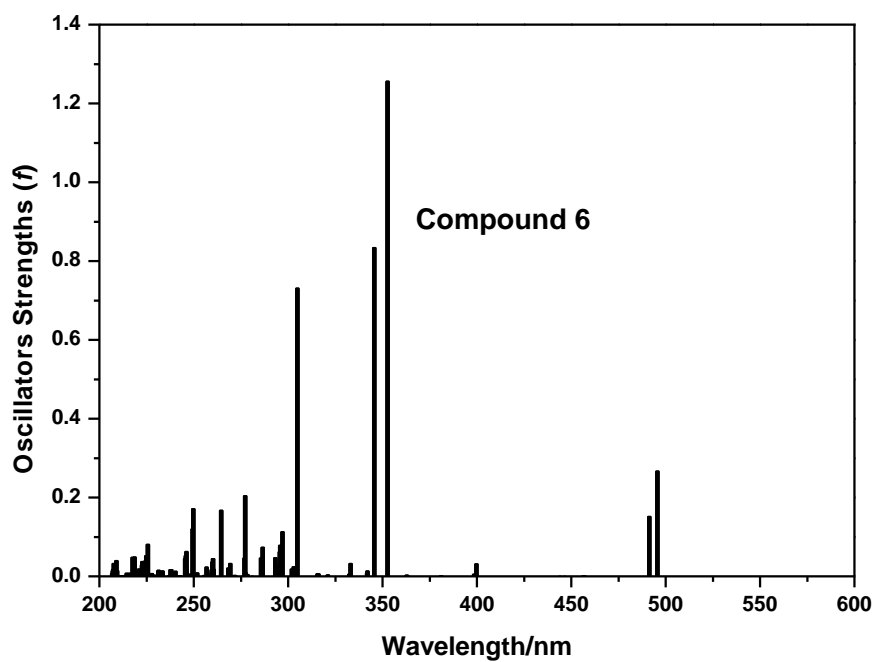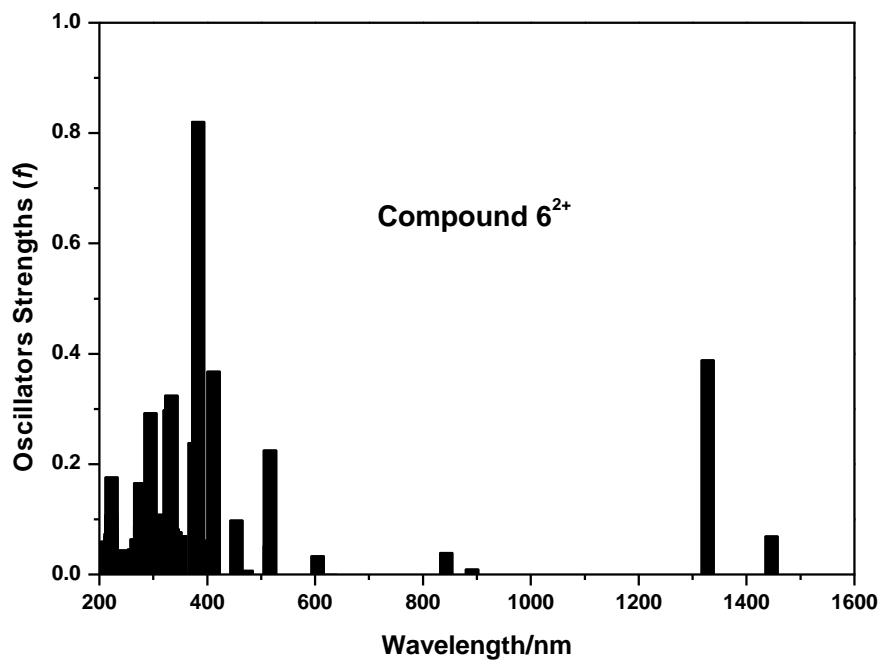

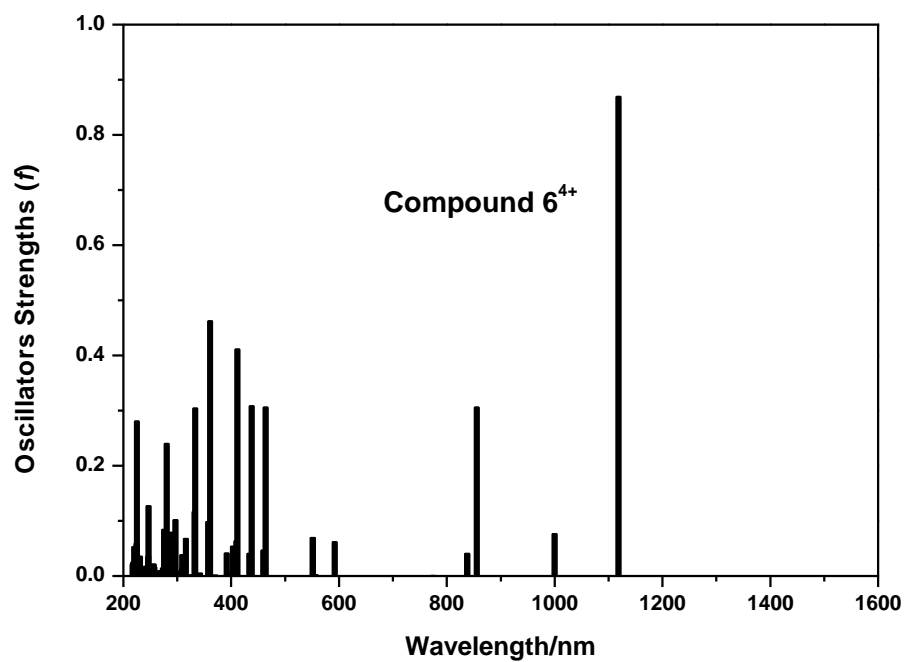

**Figure S8.** The relationship between excitation wavelength and oscillator strengths for compound **6** and its cations (**6**<sup>2+</sup> and **6**<sup>4+</sup>).
